# Supplementary material
Source: Frontiers journal article supplement (https://www.frontiersin.org/articles/476681)
Supplement: Image_3.pdf [file Image_3.pdf]

**Suppl Figure 3.**

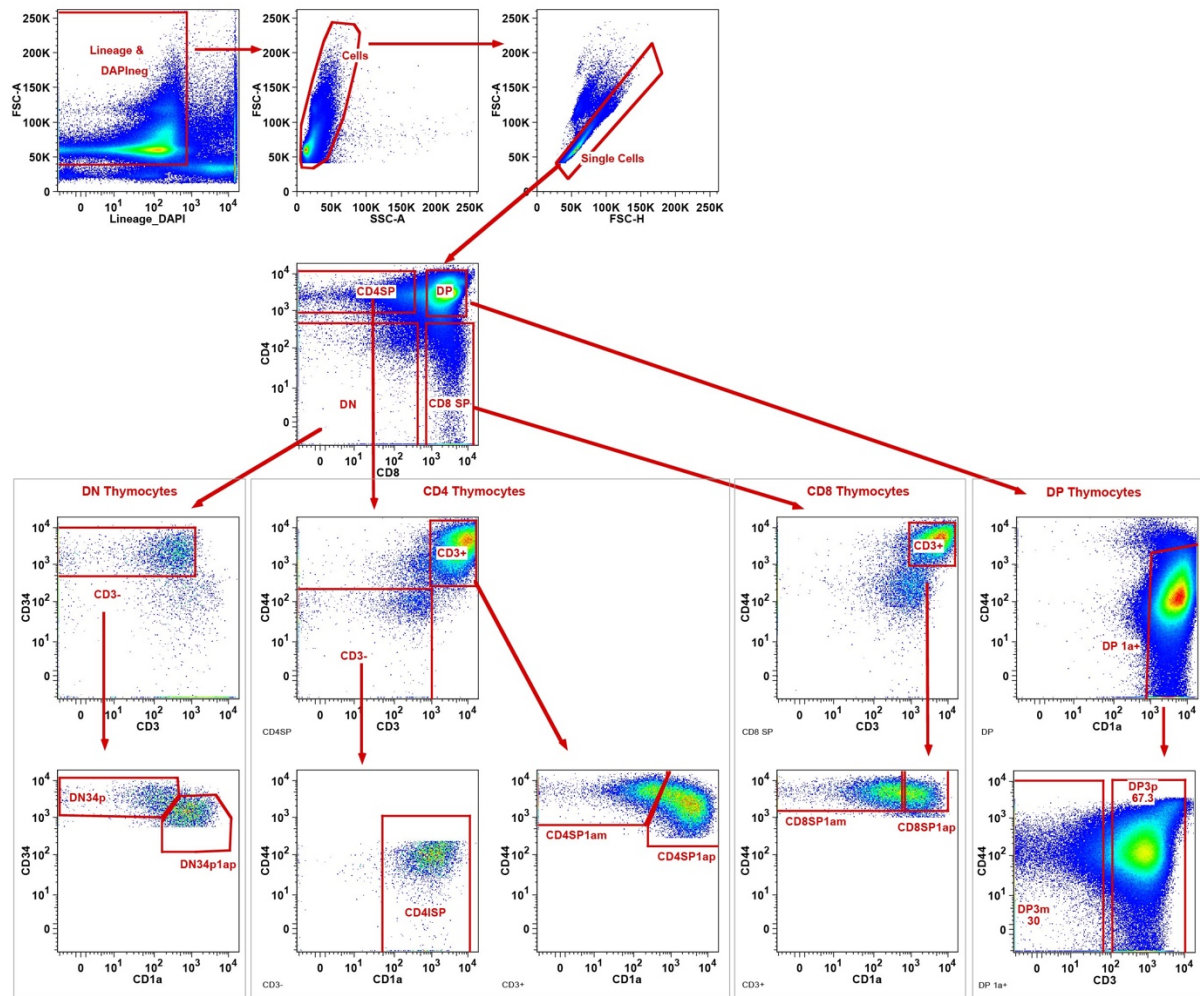

**Gating strategy and definition of thymocytes.**  $FSC^{dim}SSC^{dim}DAPI^{-}$  single thymocytes were selected, prior to subdivision based on CD4 and CD8 into four major stages: double negative (DN), single positive (SP) and double positive (DP).  $CD3^{-}$  DN thymocytes were split into the earliest  $CD34^{+}CD1a^{-}$  and subsequent  $CD34^{+}CD1a^{+}$  subsets.

Within CD4 SP,  $CD3^{-}CD1a^{+}$  immature single positive (ISP) thymocytes were defined. Double positive thymocytes were split into the earlier  $CD3^{-}$  and later  $CD3^{+}$  subsets. Finally,  $CD3^{+}$  SP within both the CD4 and CD8 lineage were separated into the earlier  $CD1a^{+}$  and later  $CD1a^{+}$  subsets.
